# Supplementary material
Source: HighWire-hosted journal article supplement (https://erj.ersjournals.com/content/59/6/2101233)

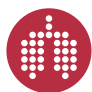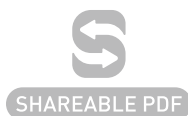

# Fraction of exhaled nitric oxide is associated with disease burden in the German Asthma Net severe asthma cohort

Christina Bal <sup>1</sup>, Marco Idzko<sup>1</sup>, Sabina Škrgat<sup>2,3,4</sup>, Andrea Koch<sup>5,6</sup>, Katrin Milger <sup>7,8,9</sup>, Christian Schulz<sup>10</sup>, Sonja Zehetmayer<sup>11</sup>, Eckard Hamelmann<sup>12,16</sup>, Roland Buhl<sup>13,16</sup>, Stephanie Korn<sup>14,15,16</sup> and collaborators from the German Asthma Net (GAN)

<sup>1</sup>Medical University of Vienna, Vienna, Austria. <sup>2</sup>Dept of Pulmonary Diseases, University Medical Centre Ljubljana, Ljubljana, Slovenia. <sup>3</sup>Faculty of Medicine, University of Ljubljana, Ljubljana, Slovenia. <sup>4</sup>University Clinic of Respiratory and Allergic Diseases Golnik, Golnik, Slovenia. <sup>5</sup>Klinikum Steyr, Dept Pneumology, Teaching Hospital of University Hospital Linz, Steyr, Austria. <sup>6</sup>German Center of Lung Science (DZL), Helmholtzzentrum München, Munich, Germany. <sup>7</sup>Dept of Internal Medicine V, Ludwig-Maximilians-University (LMU) of Munich, Munich, Germany. <sup>8</sup>Comprehensive Pneumology Center (CPC-M), Helmholtz Center Munich, Neuherberg, Germany. <sup>9</sup>Member of the German Center for Lung Research (DZL), Munich, Germany. <sup>10</sup>Dept of Internal Medicine II, University Hospital Regensburg, Regensburg, Germany. <sup>11</sup>Section for Medical Statistics, Center for Medical Statistics, Informatics, and Intelligent Systems, Medical University of Vienna, Vienna, Austria. <sup>12</sup>Kinderzentrum Bethel, Evangelisches Klinikum Bethel, University Bielefeld, Bielefeld, Germany. <sup>13</sup>Mainz University Hospital, Pulmonary Dept, Mainz, Germany. <sup>14</sup>Thoraxklinik Heidelberg, Heidelberg, Germany. <sup>15</sup>IKF Pneumologie Mainz, Mainz, Germany. <sup>16</sup>E. Hamelmann, R. Buhl and S. Korn jointly supervised this study.

Corresponding author: Stephanie Korn ([korn@ikf-pneumologie.de](mailto:korn@ikf-pneumologie.de))

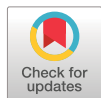

Shareable abstract (@ERSpublications)

**In a severe asthma cohort of 1007 patients, high  $F_{ENO}$  was associated with chronic rhinosinusitis/polyyps, later asthma onset, poor lung function and asthma control, low quality of life, frequent exacerbations and the need for maintenance OCS. #GANregistry** <https://bit.ly/3sNrItQ>

**Cite this article as:** Bal C, Idzko M, Škrgat S, *et al*. Fraction of exhaled nitric oxide is associated with disease burden in the German Asthma Net severe asthma cohort. *Eur Respir J* 2022; 59: 2101233 [DOI: 10.1183/13993003.01233-2021].

This single-page version can be shared freely online.

Copyright ©The authors 2022.

This version is distributed under the terms of the Creative Commons Attribution Non-Commercial Licence 4.0. For commercial reproduction rights and permissions contact [permissions@ersnet.org](mailto:permissions@ersnet.org)

Received: 24 Jan 2021  
Accepted: 9 Feb 2022

*To the Editor:*

The fraction of exhaled nitric oxide ( $F_{ENO}$ ) is a biomarker for type 2 asthma, reflecting the degree of local pulmonary inflammation linked to immune pathways, including interleukin (IL)-13 [1]. In clinical practice,  $F_{ENO}$  is a reliable marker for inhaled corticosteroid (ICS) responsiveness [2] and the efficacy of biological therapies, such as those targeting IL-4/IL-13 pathways [3, 4], as well as the detection of steroid nonadherence or resistance in severe asthma [2]. The prospective Severe Asthma Registry of the German Asthma Net (GAN) enrolls patients with severe asthma for in-depth assessment of phenotypes, underlying mechanisms and therapeutic strategies; GAN has been approved by respective ethics committees, with all included patients having signed informed consent [5]. Prior studies of  $F_{ENO}$  either included patients with asthma of any severity [6] or did not involve a comprehensive analysis in a large cohort [7]. We therefore used cross-sectional data from GAN to determine the correlation of  $F_{ENO}$  with epidemiological, laboratory, clinical, lung function, or quality of life parameters and the need for oral corticosteroid (OCS) maintenance therapy in a carefully selected severe asthma cohort to better characterise the severe asthma subtype with high  $F_{ENO}$  values.

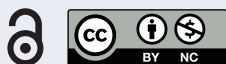

Supplement: inline-supplementary-material-1 [file inline-supplementary-material-1.pdf]
